# Supplementary material for: Parasitic infection of the eye lens affects shoaling preferences in three-spined stickleback
Source: Oxford University Press journal article supplement (doi:10.1093/biolinnean/blx155), 2017-11-23
Supplement: blx155_suppl_supplementary_file.docx [file blx155_suppl_supplementary_file.docx]

Parasitic infection of the eye lens affects shoaling preferences in three-spined stickleback

Anna K. Rahn1,*, Simon Vitt1, Lisa Drolshagen1, Jörn P. Scharsack2, Ingolf P. Rick1 & Theo C. M. Bakker1

Supplementary Material

1 Institute for Evolutionary Biology and Ecology, University of Bonn, An der Immenburg 1, 53121 Bonn, Germany

2 Institute for Evolution & Biodiversity, University of Muenster, Huefferstrasse 1, 48149 Muenster, Germany

* corresponding author, email: arahn@evolution.uni-bonn.de, phone: 0049 228 735750, fax: 0049 228 735129

**Supplementary Fig. S1.** Distribution of infection intensities (number of eyeflukes per infected individual) of 34 of the 36 fish of the mixed treatment groups. One fish was not dissected and one was free of parasites.
